# Supplementary material for: Digital Validation in Breast Cancer Needle Biopsies: Comparison of Histological Grade and Biomarker Expression Assessment Using Conventional Light Microscopy, Whole Slide Imaging, and Digital Image Analysis
Source: MDPI journal article supplement (doi:10.3390/jpm14030312), 2024-03-16
Supplement: s1 [file s1]

**Table S1.** Intra-observer agreement of the Nottingham combined histologic grade and its component scores between CLM and WSI utilizing kappa.

|                      | Observer 1          | Observer 2          | Observer 3          |
|----------------------|---------------------|---------------------|---------------------|
|                      | Kappa (95% CI)      | Kappa (95% CI)      | Kappa (95% CI)      |
| Nottingham grade     | 0.657 (0.537–0.776) | 0.691 (0.566–0.815) | 0.640 (0.507–0.761) |
| Tubule formation     | 0.588 (0.459–0.722) | 0.641 (0.494–0.772) | 0.698 (0.568–0.821) |
| Nuclear pleomorphism | 0.380 (0.181–0.563) | 0.577 (0.417–0.720) | 0.423 (0.267–0.564) |
| Mitotic counts       | 0.759 (0.640–0.866) | 0.640 (0.494–0.783) | 0.713 (0.595–0.825) |

CLM, conventional light microscopy; WSI, whole slide imaging; CI, confidence interval. All kappa coefficients demonstrated significance ( $p < 0.001$ ).

**Table S2.** Intra-observer agreement of the breast cancer biomarker expression between CLM and WSI utilizing kappa.

|      | Observer 1          | Observer 2          | Observer 3          |
|------|---------------------|---------------------|---------------------|
|      | Kappa (95% CI)      | Kappa (95% CI)      | Kappa (95% CI)      |
| ER   | 0.824 (0.712–0.919) | 0.790 (0.683–0.888) | 0.817 (0.717–0.911) |
| PR   | 0.652 (0.555–0.745) | 0.563 (0.449–0.670) | 0.716 (0.612–0.805) |
| HER2 | 0.765 (0.657–0.866) | 0.888 (0.809–0.957) | 0.713 (0.591–0.812) |
| Ki67 | 0.763 (0.639–0.872) | 0.652 (0.532–0.771) | 0.725 (0.606–0.836) |

CLM, conventional light microscopy; WSI, whole slide imaging; CI, confidence interval; ER, estrogen receptor; PR, progesterone receptor; HER2, human epidermal receptor 2. All kappa coefficients demonstrated significance ( $p < 0.001$ ).

**Table S3.** The agreement of breast cancer biomarker expression among three observers between CLM and DIA, and between WSI and DIA.

|                   | CLM / DIA           |                 | WSI / DIA           |                 |
|-------------------|---------------------|-----------------|---------------------|-----------------|
|                   | Kappa (95% CI)      | <i>p</i> -value | Kappa (95% CI)      | <i>p</i> -value |
| <b>Observer 1</b> |                     |                 |                     |                 |
| ER                | 0.678 (0.555–0.789) | < 0.001         | 0.773 (0.662–0.868) | < 0.001         |
| PR                | 0.616 (0.496–0.716) | < 0.001         | 0.663 (0.551–0.768) | < 0.001         |
| HER2              | 0.614 (0.500–0.725) | < 0.001         | 0.575 (0.449–0.691) | < 0.001         |
| Ki67              | 0.709 (0.576–0.821) | < 0.001         | 0.726 (0.610–0.851) | < 0.001         |
| <b>Observer 2</b> |                     |                 |                     |                 |
| ER                | 0.676 (0.549–0.790) | < 0.001         | 0.681 (0.566–0.794) | < 0.001         |
| PR                | 0.581 (0.475–0.684) | < 0.001         | 0.657 (0.553–0.759) | < 0.001         |
| HER2              | 0.769 (0.668–0.863) | < 0.001         | 0.714 (0.605–0.823) | < 0.001         |
| Ki67              | 0.664 (0.546–0.772) | < 0.001         | 0.660 (0.536–0.783) | < 0.001         |
| <b>Observer 3</b> |                     |                 |                     |                 |
| ER                | 0.753 (0.639–0.861) | < 0.001         | 0.764 (0.643–0.872) | < 0.001         |
| PR                | 0.645 (0.538–0.752) | < 0.001         | 0.616 (0.510–0.719) | < 0.001         |
| HER2              | 0.688 (0.565–0.794) | < 0.001         | 0.759 (0.655–0.857) | < 0.001         |
| Ki67              | 0.706 (0.584–0.855) | < 0.001         | 0.656 (0.526–0.786) | < 0.001         |

CLM, conventional light microscopy; DIA, digital image analysis; WSI, whole slide imaging; CI, confidence interval; ER, estrogen receptor; PR, progesterone receptor; HER2, human epidermal receptor 2. *P* values in bold indicate significance ( $p < 0.05$ ).

**Table S4.** Intra-class agreement of breast cancer biomarker expression between CLM and DIA, and between WSI and DIA.

|      | CLM / DIA           |                 | WSI / DIA           |                 |
|------|---------------------|-----------------|---------------------|-----------------|
|      | Kappa (95% CI)      | <i>p</i> -value | Kappa (95% CI)      | <i>p</i> -value |
| ER   | 0.720 (0.606–0.825) | < 0.001         | 0.791 (0.690–0.903) | < 0.001         |
| PR   | 0.664 (0.565–0.769) | < 0.001         | 0.675 (0.571–0.772) | < 0.001         |
| HER2 | 0.768 (0.655–0.863) | < 0.001         | 0.796 (0.698–0.878) | < 0.001         |
| Ki67 | 0.805 (0.694–0.899) | < 0.001         | 0.721 (0.600–0.833) | < 0.001         |

CLM, conventional light microscopy; DIA, digital image analysis; WSI, whole slide imaging; CI, confidence interval; ER, estrogen receptor; PR, progesterone receptor; HER2, human epidermal receptor 2. *P* values in bold indicate significance ( $p < 0.05$ ).
